# Supplementary material
Source: HighWire-hosted journal article supplement (https://bmjopen.bmj.com/content/10/2/e034529)
Supplement: inline-supplementary-material-2 [file inline-supplementary-material-2.pdf]

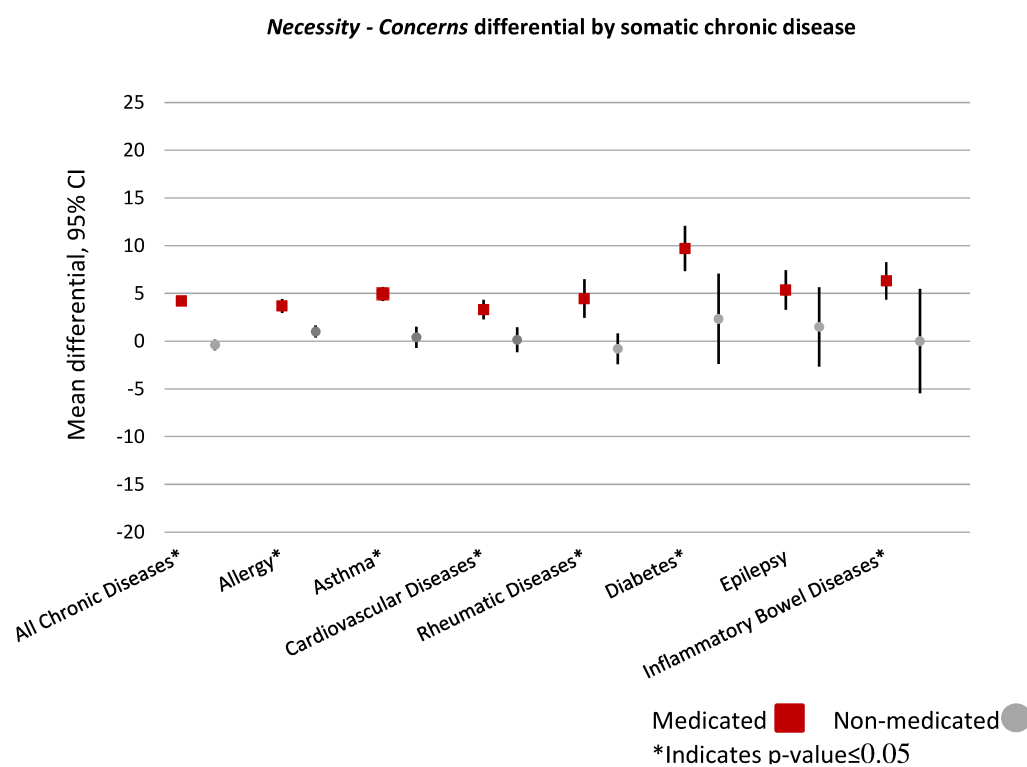

e-Figure 2. *Beliefs about Medicines Questionnaire* (BMQ) *Necessity – Concerns* differential for all chronic diseases and for each chronic disease by use of medication. Values higher than 1 indicate that the necessity of the medications is larger than the concerns. The BMQ-Specific and BMQ-General are copyrighted (©Professor Robert Horne).
